# Supplementary material for: External validation of population pharmacokinetic models of adalimumab in adult patients with inflammatory bowel disease: Towards model-informed precision dosing
Source: Research Square preprint supplement (doi:10.21203/rs.3.rs-8670135/v1), 2026-02-03
Supplement: Supplementary file 1 [file d02fbe77bb40adecb5e9a3ee.docx]

**Supplementary material**

**Title: External validation of population pharmacokinetic models of adalimumab in adult patients with inflammatory bowel disease: Towards model-informed precision dosing**

**Authors:** Irene Aguilo-Lafarga1-3, Tonet Serés-Noriega4, Vicente Gimeno Ballester1, Pilar Antonia Corsino Roche5, Raquel Vicente Lidon5, Eva Maria Sierra Moros5, Sonia Gallego5, Santiago Garcia Lopez5, Maria Reyes Abad Sazatornil1.

1 Hospital Pharmacy Service, Hospital Universitario Miguel Servet, Zaragoza, Spain.

2 Hospital Pharmacy Service, Hospital Universitario San Jorge, Huesca, Spain.

3 Facultad de Medicina, Universidad de Zaragoza, Zaragoza, Spain.

4 Endocrinology and Nutrition, Centro Médico Milenium, Zaragoza, Spain.

5 Inflammatory Bowel Disease Unit, Gastroenterology and Digestive System Department, Hospital Universitario Miguel Servet, Zaragoza, Spain.

**ORCID:**

Irene Aguilo-Lafarga, 0000-0002-9431-6967

Tonet Serés-Noriega, 0000-0003-4974-0969

**Corresponding author:**

Irene Aguilo-Lafarga, Hospital Pharmacy Service, Hospital Universitario Miguel Servet, P.º de Isabel la Católica, 1-3, 50009 Zaragoza, Spain Tel: +34  [976 76 55 00](https://www.google.com/search?q=hospital+universitario+miguel+servet&oq=Hospital+U&gs_lcrp=EgZjaHJvbWUqBwgCEAAYgAQyDggAEEUYJxg7GIAEGIoFMgYIARBFGDkyBwgCEAAYgAQyDQgDEC4YrwEYxwEYgAQyBwgEEAAYgAQyBggFEEUYPDIGCAYQRRg8MgYIBxBFGDzSAQgyNjE1ajBqN6gCALACAA&sourceid=chrome&ie=UTF-8). E-mail: ireneaguilolafarga@gmail.com

**Supplementary Table 1. Patient characteristics and adalimumab population models from literature.**

|  | | **Berends** | **FDA** | **Marquez** | **Sanchez** | **Ternant** | **Vande** |
| --- | --- | --- | --- | --- | --- | --- | --- |
| **Patient characteristics** | | | | | | |  |
| **Disease** | | CD | CD | CD/UC | CD/UC | CD | CD |
| **Study design** | | Retrospective | Prospective | Retrospective | Prospective | Prospective | Prospective |
| **Number of patients** | | 96 | 299 | 54 | 104 | 65 | 28 |
| **Sex (feminine)** | | 61 (64.0) | NA | 24 (44.4) | 46 (44.2) | 49 (75.4) | 15 (53.6) |
| **Age (years)** | | 38 (32-44) | - | 43.5 (11–89) | 43 (32-56) | 37 (17-61) | 37 (30-49) |
| **Weight (kg)** | | 65 (58-76) | - | 67 (35–94) | 68 (56-80) | 68 (43-109) | 66 (55-73) |
| **Positive AAA** | | 17 (18.0) | - | 9 (16.7) | 0 | 9 (13.8) | 5 (17.9) |
| **AAA analysis** | | Antigen-binding test | ELISA | Double-antigen ELISA | ELISA | Double-antigen ELISA | In-house developed drug-resistant AAA assay |
| **Dosing regimen** | EW | 24 (25.0) | - | 0 (0) | - | 30 (46.2) | 0 (0) |
| EOW | 72 (75.0) | - | 65 (100) | - | 35 (53.8) | 28 (100) |
| **BMI (kg/m2)** | | - | - | 22.8 (14.1–32.0) | 23.7 (21.1-27.1) | - | 22.6 (19.1-24.3) |
| **UDASC** | | - | - | - | 9 (8.7) | - | - |
| **LBW (kg)** | | - | - | - | 60.0 (51.2-67.3) | - | 47.8 (43.6-54.7) |
| **ALB (g/dL)** | | 4.3 (4.0-4.5) | - | 3.86 (1.97–4.96) | 4.5 (4.3-4.7) | - | 3.99 (3.64-4.37) |
| **FCP (mg/kg)** | | - | - | 513 (25–3600) | 74 (17-282) | - | - |
| **Pen** | 40mg | - | - | - | 275 (90.8) ∫ | 65 (100.0) | - |
| 80mg | - | - | - | 28 (9.2) ∫ | 0 (0) | - |
| **Estimates (%RSE)** | | | | | | |  |
| **Proportional error** | | 0.30 (9) | 0.32 (NA) | 0.547 (8.4) | 0.22 (13) | 0.15 (16) | -16.6 (0.07) |
| **Additive error (mg/L)** | | 1.02 (23) | - | - | - | 1.8 (8) | - |
| **CL/F (L/d)** | | 0.32 (8) | 0.30 (4.24) | 0.75 (10.9) | 0.38 (3) | 0.42 (9) | 0.33 (0.02) |
| **Vd/F (L)** | | 4.07 (27) | 9.39 (3.25) | 7.76 (24.1) | 11.2 (9) | 13.5 (10) | 7.8 (0.07) |
| **Ka (d-1)** | | 0.2 (fix) | 0.648 (fix) | 0.15 (fix) | 0.15 (fix) | 0.15 (fix) | 0.34 (0.1) |
| **AAA-CL/F** | | 3.14 (24) | - | 4.5 (fix) | - | 4.5 (NA) | 1.59 (18.1) |
| **Dosing-CL/F** | | 0.40 (23) | - | - | - | - | - |
| **BMI-CL/F** | | - | - | - | 1.11 (16) | - | - |
| **LBW-CL/F** | | - | - | - | - | - | 1.97 (0.5) |
| **ALB-CL/F** | | - | - | 0.667 (15.5) | - | - |  |
| **UDASC-CL/F** | | - | - | - | 1.20 (28) | - | - |
| **FCP-CL/F** | | - | - | - | 0.06 (24) | - | - |
| **Pen-CL/F** | | - | - | - | 0.24 (35) | - | - |
| **IIV-CL/F** | | 49.1 (12) | 0.227 (18.4) | 0.667 (15.5) | 23.2 (9) | 65 (10) | 0.326 (0.2) |
| **IIV-Vd/F** | | - | 0.123 (19.8) | 0.477 (33.9) | - | 48 (19) | 0.356 (0.04) |
| **IIV-Ka** | | - | - | - | - | - | 1.039 (1.1) |

Data are shown as n (percentage within each column), mean (SD) or median (Q1-Q3).

∫Data calculated on the total number of samples analyzed.

AAA: anti-adalimumab antibodies; ALB: serum albumin; BMI: Body mass index; CD: Crohn’s disease; CL/F: apparent clearance; EW: every week; EOW: every other week; FCP: faecal calprotectin; IIV-CL/F: interindividual variability on clearance; IIV-V**d**/F: interindividual variability on volume of distribution; fix: fixed parameter; Ka: first-order absorption constant rate; LBW: lean body weight; NA: not available; Pen: adalimumab pen device; RSE: residual standard error; UC: ulcerative colitis; UDASC: unexplained decline in adalimumab serum concentrations; V**d**/F: apparent volume of distribution.

**Supplementary Table 2. Mathematical equations describing the six population pharmacokinetic models of adalimumab in patients with inflammatory bowel disease evaluated.**

| **Population pharmacokinetic models (popPK)** | |
| --- | --- |
| **Berends** |  |
| **FDA** |  |
| **Marquez** |  |
| **Sanchez** |  |
| **Ternant** |  |
| **Vande** |  |

AAA: anti-adalimumab antibodies; ALB: serum albumin; BMI: Body mass index; CL/F: apparent clearance; DOSING: (0: Every other week, 1: Every week); FCP: faecal calprotectin; LBW: lean body weight; PEN: adalimumab pen device (0: 40mg; 1: 80 mg); UDASC: unexplained decline in adalimumab serum concentrations (0: No, 1: Yes); V**d**/F: apparent volume of distribution.

**Supplementary Table 3. Montreal classification of inflammatory bowel disease among participants.**

| **Montreal classification**  **(n=201)** | | | |
| --- | --- | --- | --- |
| **Ulcerative colitis (n=24)** | **Extension** | Proctitis | 4 (16.7) |
| Left-side colitis | 11 (45.8) |
| Pancolitis | 9 (37.5) |
| **Crohn’s disease (n=177)** | **Age at diagnosis** | ≤ 16 years | 15 (8.5) |
| 16-40 years | 83 (46.9) |
| >40 years | 79 (44.6) |
| **Location** | Ileal | 93 (52.5) |
| Colonic | 21 (11.9) |
| Colonic, upper gastrointestinal disease | 1 (0.6) |
| Ileocolonic | 62 (35.0) |
| **Behavior** | Nonstricturing, nonpenetrating | 94 (54.1) |
| Stricturing | 53 (29.9) |
| Penetrating | 30 (17.0) |
| **Perianal disease** | | 27 (15.3) |

Data are shown as n (percentage within each IBD group).

**Supplementary Figure 1. Distribution of the mean predicted error (MPE) simulated by bootstrap across the different models.**


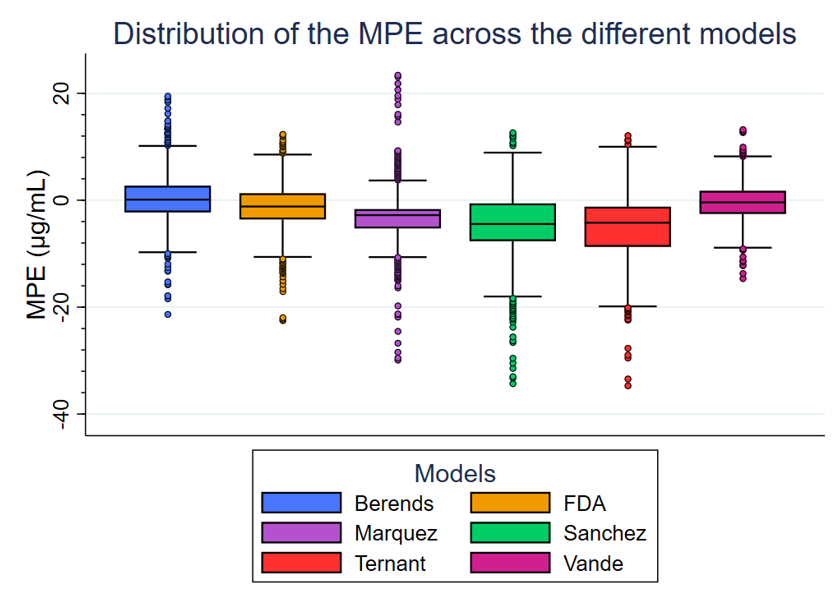


**Supplementary Figure 2. Distribution of the mean absolute predicted error (MAPE) simulated by bootstrap across the different models.**


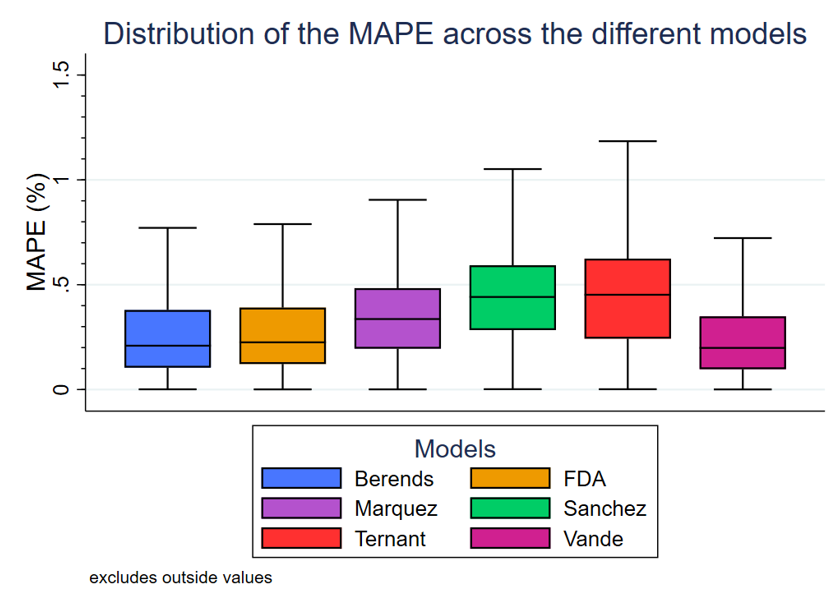


**Supplementary Figure 3. Distribution of the root mean squared error (RMSE) simulated by bootstrap across the different models.**


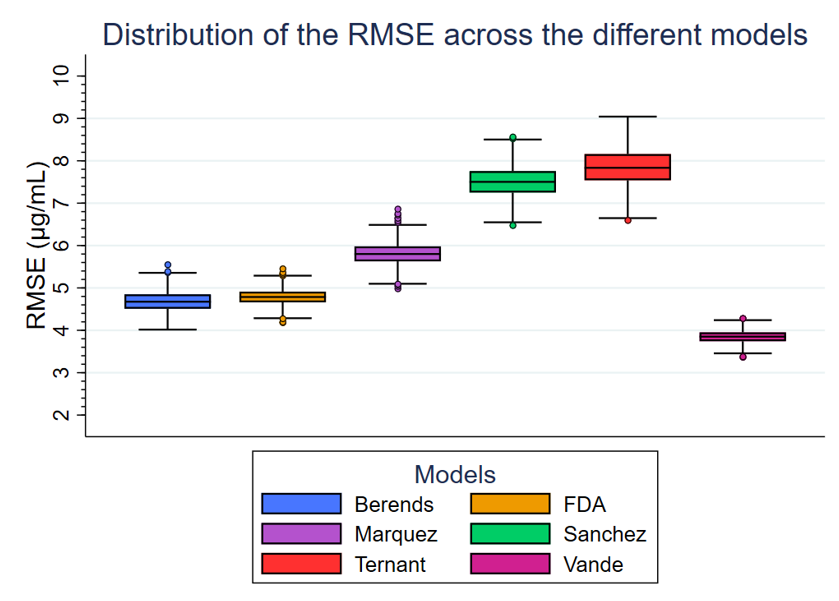


**Supplementary Figure 4. Analysis of the residuals among models.**

**
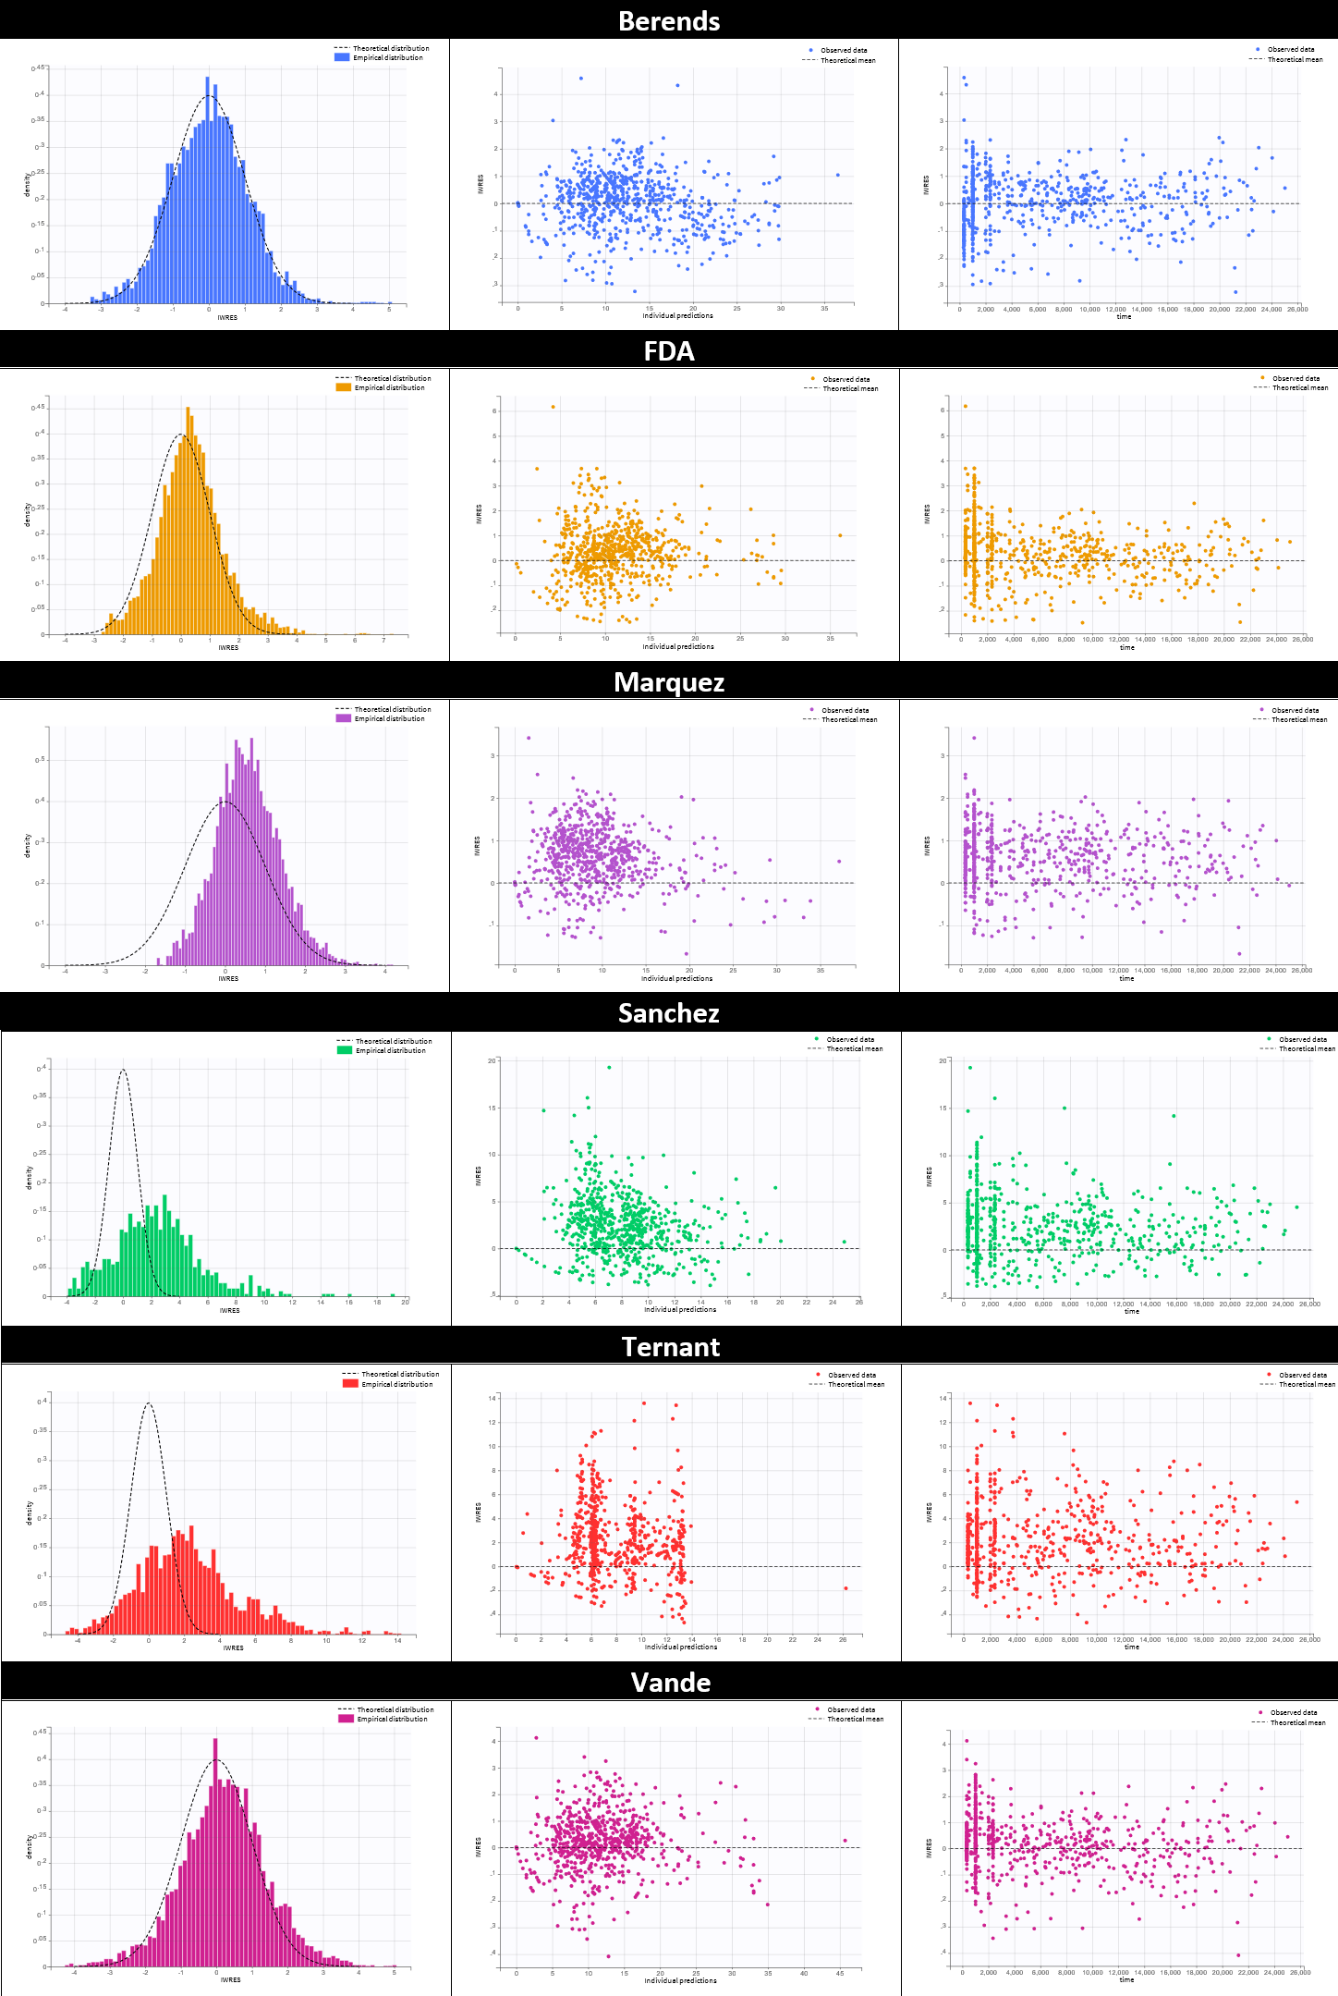
**

From left to right: distribution of the residuals, scatter plot of the residuals vs. individual prediction and vs. time.
